# Supplementary figures and images for: Gestational Early-Time Restricted Feeding Results in Sex-Specific Glucose Intolerance in Adult Male Mice
Source: Hindawi journal article supplement (doi:10.1155/2023/6666613), 2023-09-29

**Supplemental Figure 1:**

**A**

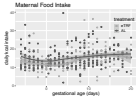

**B**

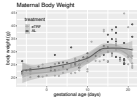

Supplement: f1 [file 6666613.f1.zip]

## Supplemental Figure 2:

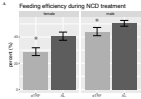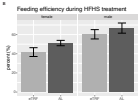

Supplement: f1 [file 6666613.f1.zip]
